# Supplementary material
Source: PubMed Central journal article supplement (PMC11096004)
Supplement: NIHMS1977853-supplement-1.pdf [file NIHMS1977853-supplement-1.pdf]

### Supplementary Figure 1: CONSORT diagram

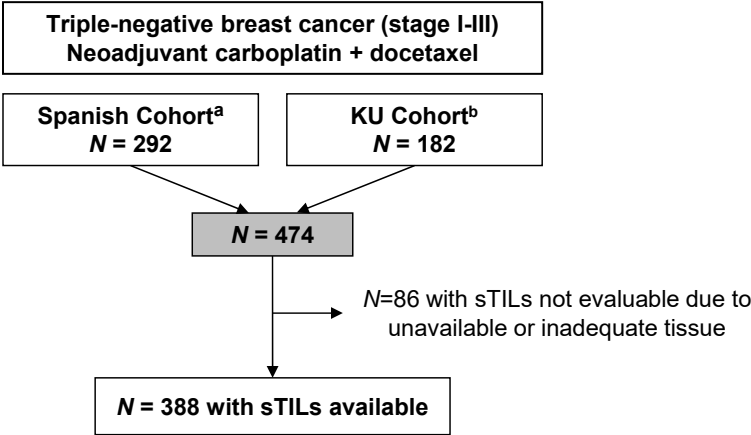

<sup>a</sup> NCT01560663. Includes a site from Lima, Peru in addition to the various sites in Spain.

<sup>b</sup> NCT02302742. Includes 15 sites across Kansas and Missouri, USA.
