# Supplementary material
Source: PubMed Central journal article supplement (PMC11096004)
Supplement: NIHMS1977853-supplement-2.pdf [file NIHMS1977853-supplement-2.pdf]

**Supplementary Figure 2: Pathologic response categories**

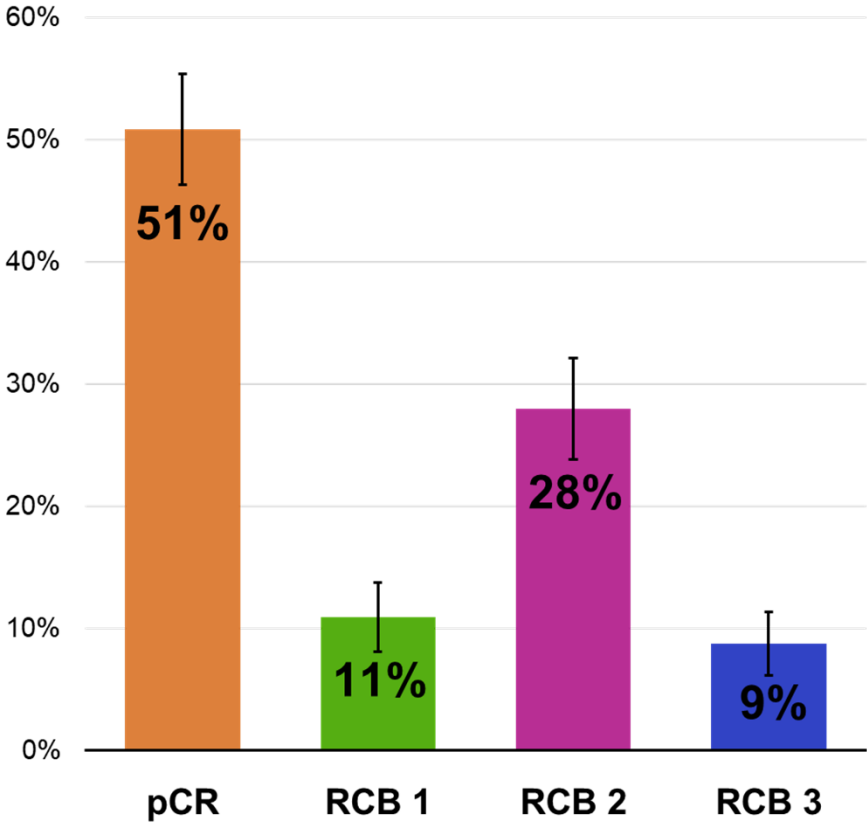

Error bars represent 95% binomial confidence intervals  
pCR status is not available for n=2 patients. RCB class is not available for n=14 patients.
