# Supplementary material
Source: PubMed Central journal article supplement (PMC11096004)
Supplement: NIHMS1977853-supplement-3.pdf [file NIHMS1977853-supplement-3.pdf]

# Supplementary Figure 3: Survival by pathologic response

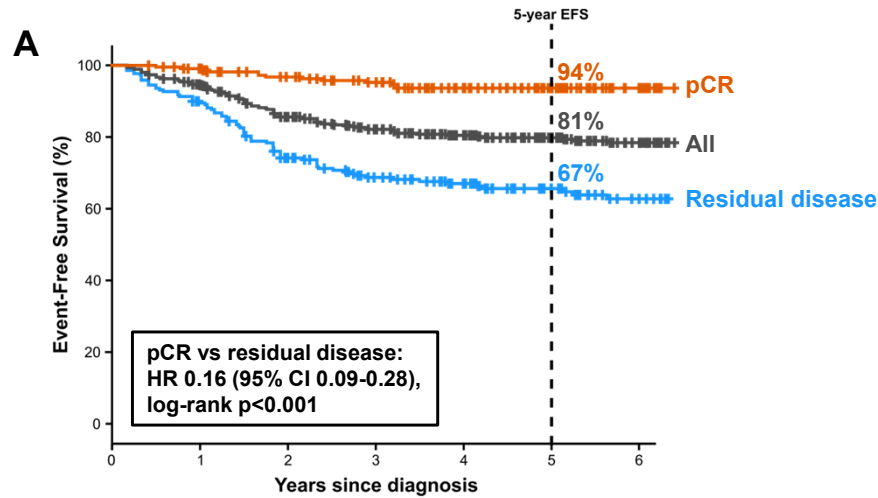

|                  | N at risk [cumulative N of events] |          |          |          |          |          |          |
|------------------|------------------------------------|----------|----------|----------|----------|----------|----------|
| All              | 474 [0]                            | 441 [24] | 384 [63] | 337 [77] | 280 [83] | 210 [85] | 151 [88] |
| pCR              | 240 [0]                            | 232 [2]  | 214 [7]  | 194 [10] | 161 [13] | 125 [13] | 90 [13]  |
| Residual disease | 232 [0]                            | 207 [22] | 168 [56] | 141 [67] | 118 [70] | 84 [72]  | 60 [75]  |

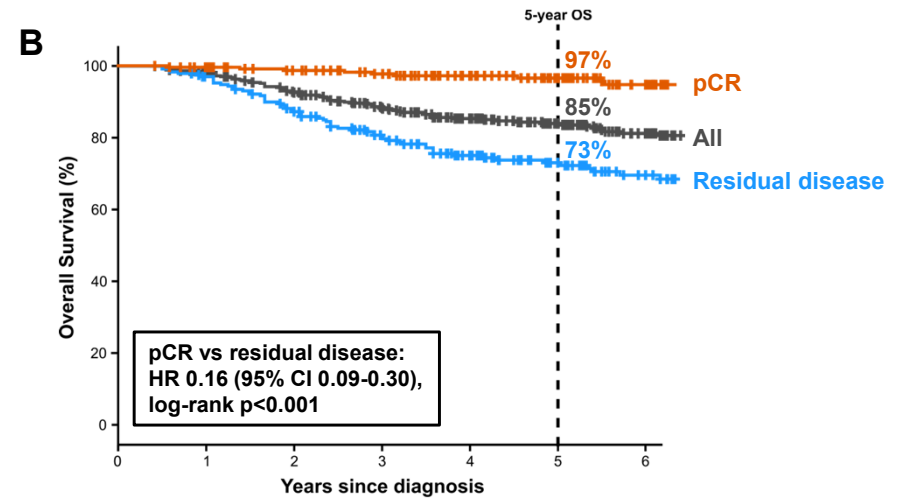

|                  | N at risk [cumulative N of events] |         |          |          |          |          |          |
|------------------|------------------------------------|---------|----------|----------|----------|----------|----------|
| All              | 474 [0]                            | 455 [8] | 415 [31] | 363 [49] | 301 [60] | 227 [64] | 162 [70] |
| pCR              | 240 [0]                            | 233 [1] | 218 [3]  | 199 [5]  | 168 [6]  | 130 [7]  | 93 [19]  |
| Residual disease | 232 [0]                            | 220 [7] | 195 [28] | 162 [44] | 132 [54] | 96 [57]  | 68 [61]  |

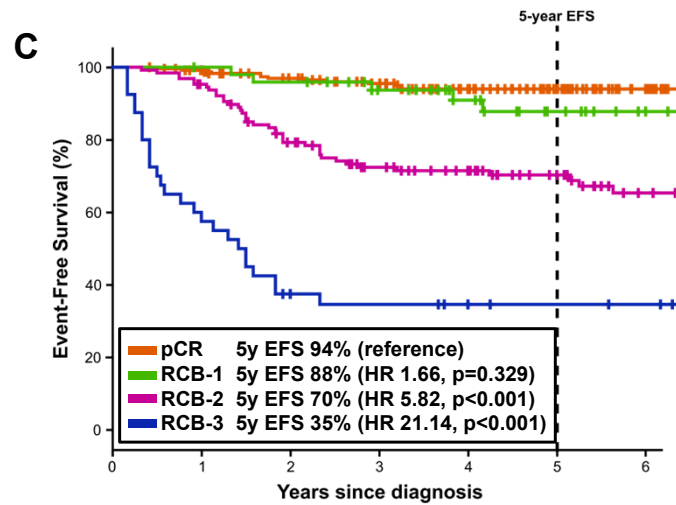

|       | N at risk [cumulative N of events] |         |         |          |          |          |         |
|-------|------------------------------------|---------|---------|----------|----------|----------|---------|
| pCR   | 240 [0]                            | 232 [2] | 214 [7] | 194 [10] | 161 [13] | 125 [13] | 90 [13] |
| RCB-1 | 50 [0]                             | 49 [0]  | 47 [2]  | 40 [3]   | 31 [4]   | 23 [5]   | 17 [5]  |
| RCB-2 | 128 [0]                            | 120 [6] | 96 [26] | 80 [34]  | 70 [35]  | 49 [36]  | 33 [39] |
| RCB-3 | 40 [0]                             | 24 [16] | 14 [25] | 12 [26]  | 10 [26]  | 6 [26]   | 5 [26]  |

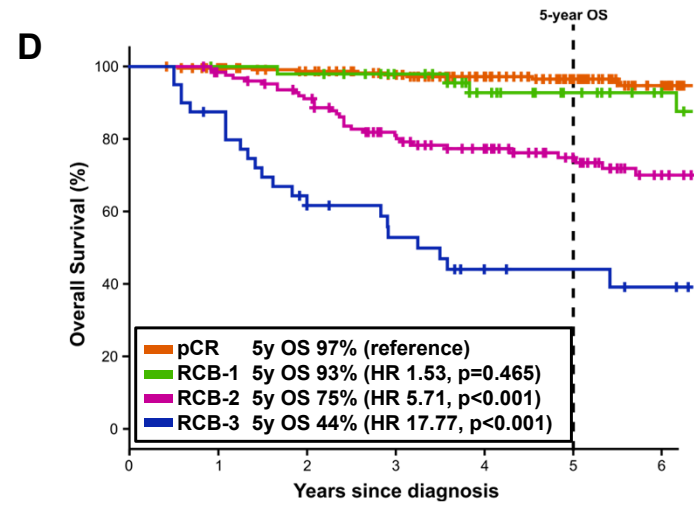

|       | N at risk [cumulative N of events] |         |          |         |         |         |         |
|-------|------------------------------------|---------|----------|---------|---------|---------|---------|
| pCR   | 240 [0]                            | 233 [1] | 218 [3]  | 199 [5] | 168 [6] | 130 [7] | 93 [19] |
| RCB-1 | 50 [0]                             | 49 [0]  | 48 [1]   | 42 [1]  | 32 [3]  | 25 [3]  | 19 [3]  |
| RCB-2 | 128 [0]                            | 123 [2] | 111 [11] | 91 [23] | 78 [27] | 55 [29] | 36 [32] |
| RCB-3 | 40 [0]                             | 34 [5]  | 24 [14]  | 18 [18] | 13 [21] | 9 [21]  | 7 [22]  |
