# Supplementary material
Source: PubMed Central journal article supplement (PMC11096004)

# Supplementary Figure 4: Survival by adjuvant chemotherapy use among patients with residual disease

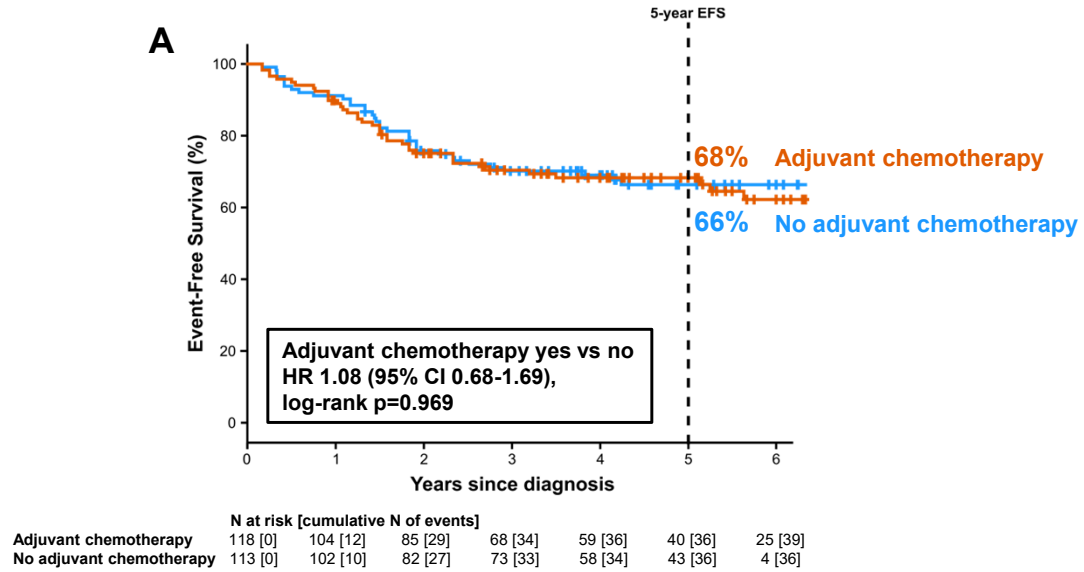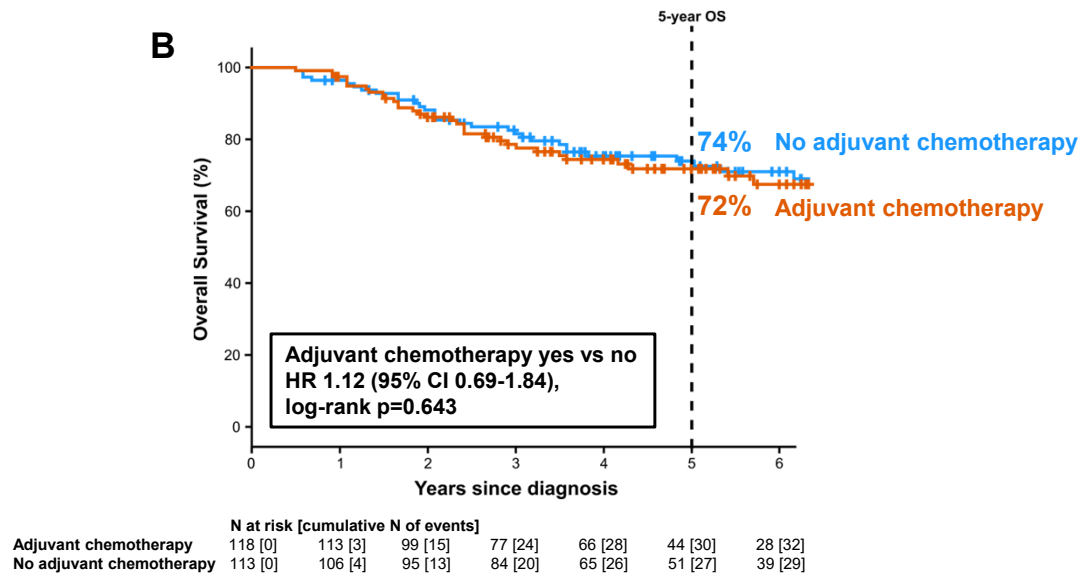

Supplement: NIHMS1977853-supplement-4.pdf [file NIHMS1977853-supplement-4.pdf]
