# Supplementary material
Source: PubMed Central journal article supplement (PMC11096004)
Supplement: NIHMS1977853-supplement-7.pdf [file NIHMS1977853-supplement-7.pdf]

| Supplementary Table 2. Baseline patient characteristics by availability of sTILs data |                     |                         |                                 |
|---------------------------------------------------------------------------------------|---------------------|-------------------------|---------------------------------|
| Characteristic – N (%)                                                                |                     | All patients<br>(N=474) | Available sTILs<br>data (N=388) |
| Age at diagnosis, years – median (range)                                              |                     | 52 (29-80)              | 53 (29-80)                      |
| Race                                                                                  | White               | 425 (90%)               | 351 (91%)                       |
|                                                                                       | Black               | 39 (8%)                 | 28 (7%)                         |
|                                                                                       | Other               | 9 (2%)                  | 8 (2%)                          |
| Ethnicity <sup>a</sup>                                                                | Non-Hispanic        | 402 (85%)               | 324 (84%)                       |
|                                                                                       | Hispanic            | 69 (15%)                | 62 (16%)                        |
| Menopausal status <sup>b</sup>                                                        | Pre                 | 221 (47%)               | 175 (45%)                       |
|                                                                                       | Post                | 251 (53%)               | 212 (55%)                       |
| Histological grade <sup>c</sup>                                                       | 1-2                 | 113 (25%)               | 88 (24%)                        |
|                                                                                       | 3                   | 341 (75%)               | 283 (76%)                       |
| T stage                                                                               | 1                   | 85 (18%)                | 66 (17%)                        |
|                                                                                       | 2                   | 271 (57%)               | 229 (59%)                       |
|                                                                                       | 3                   | 76 (16%)                | 56 (14%)                        |
|                                                                                       | 4                   | 42 (9%)                 | 37 (10%)                        |
| Lymph node status <sup>d</sup>                                                        | Negative            | 261 (55%)               | 214 (56%)                       |
|                                                                                       | Positive            | 210 (45%)               | 171 (44%)                       |
| TNM stage                                                                             | I                   | 62 (13%)                | 61 (13%)                        |
|                                                                                       | II                  | 299 (62%)               | 293 (62%)                       |
|                                                                                       | III                 | 119 (25%)               | 119 (25%)                       |
| ER/PgR                                                                                | ER and PgR <1%      | 453 (96%)               | 373 (96%)                       |
|                                                                                       | ER and/or PgR 1-10% | 21 (4%)                 | 15 (4%)                         |
| Germline <i>BRCA1/2</i> mutation                                                      | Yes                 | 63 (13%)                | 47 (12%)                        |
|                                                                                       | No                  | 371 (78%)               | 310 (80%)                       |
|                                                                                       | Unknown             | 40 (8%)                 | 31 (8%)                         |

<sup>a</sup>Race is not known for n=1 patient

<sup>b</sup>Ethnicity is not known for n=3 patients

<sup>c</sup>Menopausal status is not known for n=2 patients

<sup>d</sup>Histological grade is not available for n=20 patients

<sup>e</sup>Lymph node status is not available for n=3 patients

Abbreviations: ER, estrogen receptor; PgR, progesterone receptor; sTILs, stromal tumor-infiltrating lymphocytes
