# Supplementary material
Source: PubMed Central journal article supplement (PMC11096004)
Supplement: NIHMS1977853-supplement-8.pdf [file NIHMS1977853-supplement-8.pdf]

| <b>Supplementary Table 3. Survival by availability of sTILs data</b> |                             |                                     |
|----------------------------------------------------------------------|-----------------------------|-------------------------------------|
|                                                                      | <b>All patients (N=474)</b> | <b>Available sTILs data (N=388)</b> |
| <b>5-year EFS</b>                                                    | 81% (95% CI: 77%-85%)       | 80% (95% CI: 76%-85%)               |
| <b>5-year OS</b>                                                     | 85% (95% CI: 81%-88%)       | 84% (95% CI: 81%-88%)               |

Abbreviations: CI: confidence interval; EFS, event-free survival; OS, overall survival; sTILs, stromal tumor-infiltrating lymphocytes
