# Supplementary material
Source: PubMed Central journal article supplement (PMC11096004)
Supplement: NIHMS1977853-supplement-9.pdf [file NIHMS1977853-supplement-9.pdf]

| Supplementary Table 4. Patient characteristics by enrolling study cohort |                     |                           |                      |                |
|--------------------------------------------------------------------------|---------------------|---------------------------|----------------------|----------------|
| Characteristic – N (%)                                                   |                     | Spanish cohort<br>(N=292) | KU cohort<br>(N=182) | p <sup>a</sup> |
| Age at diagnosis, years – median (range)                                 |                     | 53 (29-80)                | 51 (29-80)           | 0.162          |
| Race <sup>b</sup>                                                        | White               | 283 (97%)                 | 142 (78%)            | <0.001         |
|                                                                          | Black               | 4 (1%)                    | 35 (19%)             |                |
|                                                                          | Other               | 4 (1%)                    | 5 (3%)               |                |
| Ethnicity <sup>c</sup>                                                   | Non-Hispanic        | 225 (78%)                 | 177 (97%)            | <0.001         |
|                                                                          | Hispanic            | 64 (22%)                  | 5 (3%)               |                |
| Menopausal status <sup>d</sup>                                           | Pre                 | 138 (48%)                 | 83 (46%)             | 0.674          |
|                                                                          | Post                | 152 (52%)                 | 99 (54%)             |                |
| Histological grade <sup>e</sup>                                          | 1-2                 | 82 (30%)                  | 31 (17%)             | 0.002          |
|                                                                          | 3                   | 190 (70%)                 | 151 (83%)            |                |
| T stage                                                                  | 1-2                 | 205 (70%)                 | 151 (83%)            | 0.002          |
|                                                                          | 3-4                 | 87 (30%)                  | 31 (17%)             |                |
| Lymph node status <sup>f</sup>                                           | Negative            | 135 (47%)                 | 126 (69%)            | <0.001         |
|                                                                          | Positive            | 154 (53%)                 | 56 (31%)             |                |
| TNM stage                                                                | I                   | 17 (6%)                   | 45 (25%)             | <0.001         |
|                                                                          | II                  | 184 (63%)                 | 109 (60%)            |                |
|                                                                          | III                 | 91 (31%)                  | 28 (15%)             |                |
| ER/PgR                                                                   | ER and PgR <1%      | 292 (100%)                | 161 (88%)            | <0.001         |
|                                                                          | ER and/or PgR 1-10% | 0 (0%)                    | 21 (12%)             |                |
| Germline <i>BRCA1/2</i> mutation                                         | Yes                 | 28 (10%)                  | 35 (19%)             | 0.002          |
|                                                                          | No                  | 244 (84%)                 | 127 (70%)            |                |
|                                                                          | Unknown             | 20 (7%)                   | 20 (11%)             |                |
| sTILs, % – median (range) <sup>g</sup>                                   |                     | 5 (1-95)                  | 15 (1-95)            | <0.001         |
| sTILs <sup>g</sup>                                                       | <30%                | 187 (75%)                 | 76 (55%)             | <0.001         |
|                                                                          | ≥30%                | 62 (25%)                  | 63 (45%)             |                |
| pCR <sup>h</sup>                                                         | Yes                 | 136 (47%)                 | 104 (57%)            | 0.030          |
|                                                                          | No                  | 154 (53%)                 | 78 (43%)             |                |

Abbreviations: ER, estrogen receptor; pCR, pathologic complete response; PgR, progesterone receptor; sTILs, stromal tumor-infiltrating lymphocytes

<sup>a</sup>Chi-square or Mann-Whitney U

<sup>b</sup>Race is not known for n=1 patient

<sup>c</sup>Ethnicity is not known for n=3 patients

<sup>d</sup>Menopausal status is not known for n=2 patients

<sup>e</sup>Histological grade is not available for n=20 patients

<sup>f</sup>Lymph node status is not available for n=3 patients

<sup>g</sup>sTILs score is not available for n=86 patients

<sup>h</sup>pCR information is not available for n=2 patients
